# Supplementary material for: Phenotypic Characterization and Transformation Attempts Reveal Peculiar Traits of Xylella fastidiosa Subspecies pauca Strain De Donno
Source: Microorganisms. 2020 Nov 20;8(11):1832. doi: 10.3390/microorganisms8111832 (PMC7699976; doi:10.3390/microorganisms8111832)
Supplement: Supplementary file 1 [file microorganisms-08-01832-s001.xlsx]

## Sheet: Table S1
Table S1. In silico prediction of the effects of sequence variations in genes involved in natural competence and twitching motility.
Gene	Protein ID (RefSeq X. fastidiosa Temecula1)	aa Position (RefSeq X. fastidiosa Temecula1)	aa (X. fastidiosa Temecula1)	aa (X. fastidiosa De Donno)	Variation type	PROVEAN score	Prediction (cutoff= -2.5)	Number of supporting sequences used	Number of clusters
comA	AAO28238	1	M	MDDMKPEQRHVLQRCWVDVLSVIRHATCLRYLGFPAL	Insertion	2885	Neutral	66	30
comA		33	V	A	Single aa substitution	-0.185	Neutral	66	30
comA		126	A	V	Single aa substitution	-1067	Neutral	66	30
comA		128	V	A	Single aa substitution	0.170	Neutral	66	30
comA		133	S	N	Single aa substitution	0.078	Neutral	66	30
comA		154	M	L	Single aa substitution	-0.648	Neutral	66	30
comA		178	M	A	Single aa substitution	0.827	Neutral	66	30
comA		185	L	V	Single aa substitution	-1287	Neutral	66	30
comA		200	A	V	Single aa substitution	-0.982	Neutral	66	30
comA		208	L	S	Single aa substitution	1580	Neutral	66	30
comA		266	V	L	Single aa substitution	1039	Neutral	66	30
comA		274	W	C	Single aa substitution	-0.578	Neutral	66	30
comA		278	I	L	Single aa substitution	0.567	Neutral	66	30
comA		358	M	L	Single aa substitution	0.603	Neutral	66	30
comA		368	S	P	Single aa substitution	0.592	Neutral	66	30
comA		369	C	W	Single aa substitution	1638	Neutral	66	30
comA		400	L	F	Single aa substitution	-2788	Deleterious	66	30
comA		440	N	T	Single aa substitution	0.933	Neutral	66	30
comA		441	F	C	Single aa substitution	0.865	Neutral	66	30
comA		443	Q	E	Single aa substitution	0.453	Neutral	66	30
comA		471	G	W	Single aa substitution	-0.821	Neutral	66	30
comA		630	R	T	Single aa substitution	0.042	Neutral	66	30
comF	AAO27949	12	T	P	Single aa substitution	-0.797	Neutral	81	30
comF		18	R	H	Single aa substitution	-1231	Neutral	81	30
comF		110	E	A	Single aa substitution	1271	Neutral	81	30
comF		143	L	R	Single aa substitution	6029	Neutral	81	30
comF		157	L	V	Single aa substitution	-1342	Neutral	81	30
comF		176	I	L	Single aa substitution	0.021	Neutral	81	30
comF		202	T	A	Single aa substitution	1359	Neutral	81	30
pilA-1	AAO29754	39	V	L	Single aa substitution	-1547	Neutral	69	30
pilA-1		64	T	S	Single aa substitution	-0.390	Neutral	69	30
pilA-1		85	E	D	Single aa substitution	0.551	Neutral	69	30
pilA-1		86	N	A	Single aa substitution	0.401	Neutral	69	30
pilA-1		87	T	A	Single aa substitution	-0.291	Neutral	69	30
pilA-1		89	L	T	Single aa substitution	1714	Neutral	69	30
pilA-1		95	T	K	Single aa substitution	-3820	Deleterious	69	30
pilA-1		96	I	V	Single aa substitution	-0.606	Neutral	69	30
pilA-1		104	G	D	Single aa substitution	-4202	Deleterious	69	30
pilA-1		105	Q	K	Single aa substitution	1237	Neutral	69	30
pilA-1		110	N	D	Single aa substitution	-0.556	Neutral	69	30
pilA-1		112	S	T	Single aa substitution	0.113	Neutral	69	30
pilA-1		113	V	S	Single aa substitution	0.790	Neutral	69	30
pilA-1		122	A	V	Single aa substitution	0.522	Neutral	69	30
pilA-1		127	Q	V	Single aa substitution	0.361	Neutral	69	30
pilA-1		131	N	S	Single aa substitution	1198	Neutral	69	30
pilA-1		132	T	S	Single aa substitution	-2211	Neutral	69	30
pilA-1		145	T	I	Single aa substitution	-2294	Neutral	69	30
pilA-1		147	A	S	Single aa substitution	-0.131	Neutral	69	30
pilB	AAO29757	56	A	T	Single aa substitution	-1724	Neutral	197	30
pilB		85	N	S	Single aa substitution	-0.184	Neutral	197	30
pilB		160	D	E	Single aa substitution	-1777	Neutral	197	30
pilB		476	A	V	Single aa substitution	-0.544	Neutral	197	30
pilB		565	I	M	Single aa substitution	-1051	Neutral	197	30
pilM	AAO29533	1	M	.	Deletion	-0.068	Neutral	153	30
pilM		2	V	.	Deletion	0.005	Neutral	153	30
pilM		3	R	.	Deletion	-0.209	Neutral	153	30
pilM		4	G	.	Deletion	-0.148	Neutral	153	30
pilM		5	V	.	Deletion	-0.555	Neutral	153	30
pilM		6	F	.	Deletion	-0.028	Neutral	153	30
pilM		7	V	M	Single aa substitution	1003	Neutral	153	30
pilM		57	K	R	Single aa substitution	-2370	Neutral	153	30
pilM		101	A	V	Single aa substitution	-3130	Deleterious	153	30
pilM		222	A	T	Single aa substitution	3786	Neutral	153	30
pilM		267	P	S	Single aa substitution	-7574	Deleterious	153	30
pilN	AAO29532	23	V	M	Single aa substitution	-0.504	Neutral	84	30
pilN		58	V	A	Single aa substitution	0.809	Neutral	84	30
pilN		125	L	V	Single aa substitution	-0.150	Neutral	84	30
pilN		190	P	T	Single aa substitution	0.477	Neutral	84	30
pilN		192	K	D	Single aa substitution	0.213	Neutral	84	30
pilN		201	N	T	Single aa substitution	0.013	Neutral	84	30
pilN		206	S	V	Single aa substitution	-0.541	Neutral	84	30
pilN		207	A	V	Single aa substitution	-0.508	Neutral	84	30
pilN		208	S	A	Single aa substitution	0.448	Neutral	84	30
pilN		209	S	P	Single aa substitution	0.272	Neutral	84	30
pilN		219	D	A	Single aa substitution	0.631	Neutral	84	30
pilO	AAO29531	29	V	I	Single aa substitution	-0.241	Neutral	81	30
pilO		43	V	A	Single aa substitution	-0.950	Neutral	81	30
pilO		83	A	V	Single aa substitution	-1798	Neutral	81	30
pilO		131	Q	K	Single aa substitution	1187	Neutral	81	30
pilO		179	R	K	Single aa substitution	0.569	Neutral	81	30
pilO		206	A	V	Single aa substitution	-0.943	Neutral	81	30
pilO		221	G	A	Single aa substitution	-0.522	Neutral	81	30
pilQ	AAO29529	7	R	S	Single aa substitution	-1069	Neutral	82	30
pilQ		20	V	F	Single aa substitution	-0.617	Neutral	82	30
pilQ		26	L	V	Single aa substitution	0.725	Neutral	82	30
pilQ		30	E	A	Single aa substitution	0.477	Neutral	82	30
pilQ		35	I	M	Single aa substitution	-0.065	Neutral	82	30
pilQ		43	P	V	Single aa substitution	-1160	Neutral	82	30
pilQ		57	A	P	Single aa substitution	-1117	Neutral	82	30
pilQ		59	A	V	Single aa substitution	-1841	Neutral	82	30
pilQ		60	T	A	Single aa substitution	0.373	Neutral	82	30
pilQ		414	N	H	Single aa substitution	-1579	Neutral	82	30
pilQ		415	V	VT	Insertion	2483	Neutral	82	30
pilQ		418	G	D	Single aa substitution	-0.260	Neutral	82	30
recA	AAO27993	85	R	K	Single aa substitution	0.422	Neutral	3303	30
recA		151	R	K	Single aa substitution	1320	Neutral	3303	30
recA		200	I	V	Single aa substitution	0.853	Neutral	3303	30
recA		316	F	L	Single aa substitution	1783	Neutral	3303	30
recA		346	A	T	Single aa substitution	-0.222	Neutral	3303	30
